# Supplementary material
Source: ML conference proceedings conference paper supplement (https://proceedings.mlr.press/v51/li16c.html)
Supplement: Supplementary file 1 [file li16c-supp.pdf]

## A Proof of Lemma 2

For simplicity, we assume that  $d_1 = \dots = d_p = m = d/p$ . For any  $s \in \mathbb{Z}^+$ , we define the lower triangular matrix  $D_s \in \mathbb{R}^{s \times s}$  as

$$D_s = \begin{bmatrix} 1 & 0 & 0 & \dots & 0 & 0 \\ 1 & 1 & 0 & \dots & 0 & 0 \\ 1 & 1 & 1 & \dots & 0 & 0 \\ \vdots & \vdots & \vdots & \dots & \vdots & \vdots \\ 1 & 1 & 1 & \dots & 1 & 1 \end{bmatrix}$$

By the definition of  $L_j$ , we have

$$L_j \geq \lambda_{\max}(A_j^\top A_j), \forall j.$$

Then we have

$$\begin{aligned} & \mathcal{F}(x^{(t+1)}) - \mathcal{F}(x^*) \\ & \stackrel{(i)}{\leq} \langle \nabla \mathcal{L}(x^{(t+1)}), x^{(t+1)} - x^* \rangle + \mathcal{R}(x^{(t+1)}) - \mathcal{R}(x^*) \\ & \stackrel{(ii)}{\leq} \langle \nabla \mathcal{L}(x^{(t+1)}), x^{(t+1)} - x^* \rangle + \langle \xi^{(t+1)}, x^{(t+1)} - x^* \rangle - \frac{\mu}{2} \|x^{(t+1)} - x^*\|^2 \\ & \stackrel{(iii)}{\leq} \sum_{j=1}^p \langle \nabla_j \mathcal{L}(x^{(t+1)}) - \nabla_j \mathcal{L}(x^{(t)}), x_j^{(t+1)} - x_j^* \rangle - \sum_{j=1}^p L_j \langle x_j^{(t+1)} - x_j^{(t)}, x_j^{(t+1)} - x_j^* \rangle - \frac{\mu}{2} \|x^{(t+1)} - x^*\|^2 \\ & = \sum_{j=1}^p \left\langle \sum_{k \geq j} A_k (x_k^{(t+1)} - x_k^{(t)}), A_j (x_j^{(t+1)} - x_j^*) \right\rangle - (x^{(t+1)} - x^{(t)})^\top (\tilde{P} \otimes I_m) (x^{(t+1)} - x^*) - \frac{\mu}{2} \|x^{(t+1)} - x^*\|^2 \\ & \leq (x^{(t+1)} - x^{(t)})^\top \tilde{A}^\top (D_p \otimes I_m) \tilde{A} (x^{(t+1)} - x^*) - (x^{(t+1)} - x^{(t)})^\top (\tilde{P} \otimes I_m) (x^{(t+1)} - x^*) - \frac{\mu}{2} \|x^{(t+1)} - x^*\|^2 \\ & = (x^{(t+1)} - x^{(t)})^\top \left( \tilde{A}^\top (D_p \otimes I_m) \tilde{A} - \tilde{P} \otimes I_m \right) (x^{(t+1)} - x^*) - \frac{\mu}{2} \|x^{(t+1)} - x^*\|^2 \\ & \stackrel{(iv)}{=} (x^{(t+1)} - x^{(t)})^\top \left( (A^\top A - \tilde{A}^\top \tilde{A}) \odot D_d + \tilde{A}^\top \tilde{A} - \tilde{P} \otimes I_m \right) (x^{(t+1)} - x^*) - \frac{\mu}{2} \|x^{(t+1)} - x^*\|^2, \end{aligned}$$

where (i) is from (11), (ii) is from Assumption 2, (iii) is from the optimality condition to the subproblem associated with  $x_j$ ,

$$\langle \nabla_j \mathcal{L}(x^{(t)}) + L_j (x_j^{(t+1)} - x_j^{(t)}) + \xi_j^{(t+1)}, x_j - x_j^{(t+1)} \rangle \geq 0 \text{ for any } x_j \in \mathbb{R}^m,$$

and (iv) comes from the fact that

$$\tilde{A}^\top (D_p \otimes I_m) \tilde{A} = (A^\top A - \tilde{A}^\top \tilde{A}) \odot D_d + \tilde{A}^\top \tilde{A},$$

where  $\odot$  denotes the Hadamard product and  $\mathbf{1}_n \in \mathbb{R}^{n \times n}$  is a matrix with all entries as 1.

Let us define

$$B = (A^\top A - \tilde{A}^\top \tilde{A}) \odot D_d + \tilde{A}^\top \tilde{A} - \tilde{P} \otimes I_m,$$

then we have

$$\mathcal{F}(x^{(t+1)}) - \mathcal{F}(x^*) \leq (x^{(t+1)} - x^{(t)})^\top B (x^{(t+1)} - x^*) - \frac{\mu}{2} \|x^{(t+1)} - x^*\|^2, \quad (28)$$

Maximizing R.H.S. of the above inequality over  $x^*$ , we obtain

$$-\mu(x^* - x^{(t+1)}) - B^\top (x^{(t+1)} - x^{(t)}) = 0.$$

which implies

$$x^* = -\frac{B^\top(x^{(t+1)} - x^{(t)})}{\mu} + x^{(t+1)}. \quad (29)$$

Plugging (29) into (28), we obtain

$$\begin{aligned} \mathcal{F}(x^{(t+1)}) - \mathcal{F}(x^*) &\leq \frac{1}{2\mu} \|B(x^{(t+1)} - x^{(t)})\|^2 \leq \frac{\lambda_{\max}^2(B)}{2\mu} \|x^{(t+1)} - x^{(t)}\|^2 \\ &\stackrel{(i)}{\leq} \frac{\lambda_{\max}^2 \left( \left( A^\top A - \tilde{A}^\top \tilde{A} \right) \odot D_d \right)}{2\mu} \|x^{(t+1)} - x^{(t)}\|^2 \\ &\stackrel{(ii)}{\leq} \frac{\lambda_{\max}^2 \left( A^\top A - \tilde{A}^\top \tilde{A} \right) \left( 1 + \frac{1}{\pi} + \frac{\log(d)}{\pi} \right)^2}{2\mu} \|x^{(t+1)} - x^{(t)}\|^2 \\ &\stackrel{(iii)}{\leq} \frac{\lambda_{\max}^2 \left( A^\top A - \tilde{A}^\top \tilde{A} \right) \log^2(2d)}{2\mu} \|x^{(t+1)} - x^{(t)}\|^2 \\ &\stackrel{(iv)}{\leq} \frac{L^2 \log^2(2d)}{2\mu} \|x^{(t+1)} - x^{(t)}\|^2, \end{aligned}$$

where (i) comes from (12), which indicates that  $\lambda_{\max}(\tilde{A}^\top \tilde{A} - \tilde{P} \otimes I_m) \leq 0$ , (iii) is true if  $d \geq 3$ , and (iv) comes from  $d \leq p \cdot d_{\max}$  and the fact that

$$\lambda_{\max} \left( A^\top A - \tilde{A}^\top \tilde{A} \right) \leq \lambda_{\max} \left( A^\top A \right) + \lambda_{\max} \left( -\tilde{A}^\top \tilde{A} \right) \leq \lambda_{\max} \left( A^\top A \right) \leq L.$$

Inequality (ii) follows from the result on the spectral norm of the triangular truncation operator in (Angelos et al., 1992). More specifically, let us define

$$L_d = \max \left\{ \frac{\|A \odot D_d\|}{\|A\|} : A \in \mathbb{R}^{d \times d}, A \neq \mathbf{0} \right\}.$$

Then we have

$$\left| \frac{L_d}{\log d} - \frac{1}{\pi} \right| \leq \frac{\left( 1 + \frac{1}{\pi} \right)}{\log d}.$$

The final claim holds by the fact that  $d \leq p \cdot d_{\max}$ .
